# Supplementary material
Source: MDPI journal article supplement (https://www.mdpi.com/2075-163X/12/1/72)
Supplement: s1 [file s1]

# Supplementary material S1:

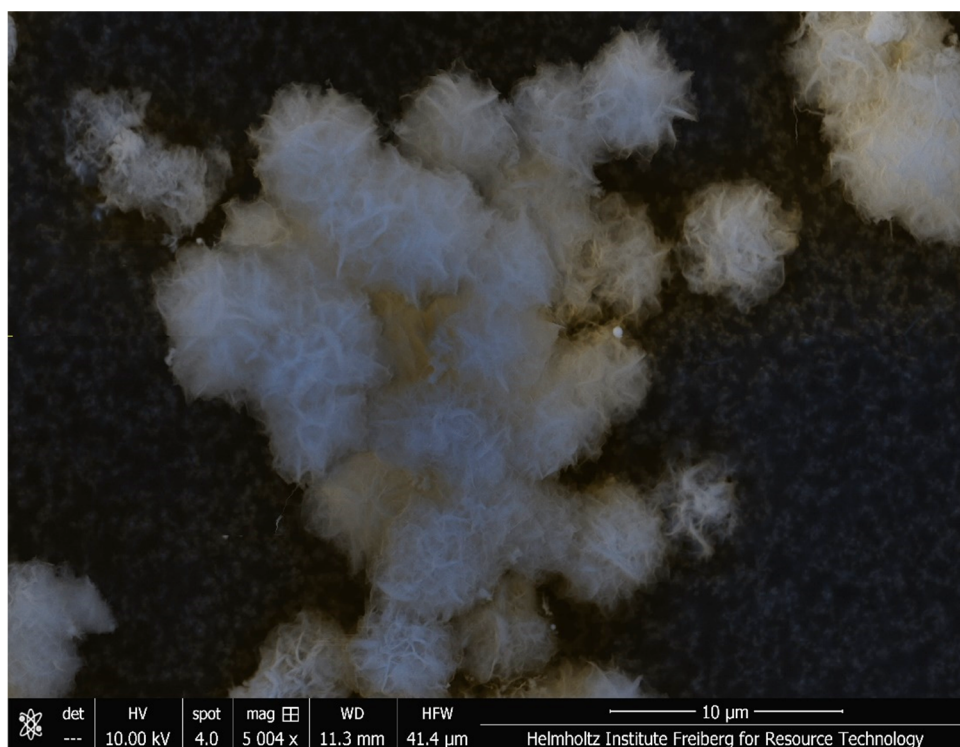

Figure S1. SEM image with impose color of the supernatant particles on top of the pulp after attrition of spent black mass
