# Supplementary material
Source: MDPI journal article supplement (https://www.mdpi.com/2075-163X/12/1/72)
Supplement: s1 [file s1]

## Supplementary material S2

Table S1. Experimental data obtained with the model and spent black mass during the 3 type of flotation tests: no attrition (I), attrition (II) and attrition with kerosene (III).

| No Attrition (I)    |                               |                              |          |                               |            |
|---------------------|-------------------------------|------------------------------|----------|-------------------------------|------------|
| Spent Black mass    |                               |                              |          |                               |            |
| Cumulative time (s) | Cumulative water recovery (%) | Cumulative LMOS recovery (%) | R/W LMOs | Cumulative water recovery (%) | ENT Tracer |
| 18                  | 1.76                          | 5.81                         | 3.30     | 1.25                          | 0.71       |
| 36                  | 3.29                          | 10.36                        | 3.15     | 2.28                          | 0.69       |
| 54                  | 4.51                          | 13.45                        | 2.99     | 2.86                          | 0.64       |
| 90                  | 6.05                          | 018.18                       | 3.00     | 3.88                          | 0.64       |
| 390                 | 12.97                         | 31.67                        | 2.44     | 7.12                          | 0.55       |
| Model Black mass    |                               |                              |          |                               |            |
| Cumulative time (s) | Cumulative water recovery (%) | Cumulative LMOS recovery (%) | R/W LMOs | Cumulative water recovery (%) | ENT Tracer |
| 18                  | 5.58                          | 6.16                         | 1.10     | 2.60                          | 0.47       |
| 36                  | 6.82                          | 6.91                         | 1.01     | 2.88                          | 0.42       |
| 54                  | 7.18                          | 7.10                         | 0.99     | 2.95                          | 0.41       |
| 90                  | 7.77                          | 7.40                         | 0.95     | 3.04                          | 0.39       |
| 390                 | 13.00                         | 8.68                         | 0.67     | 3.78                          | 0.29       |
| Attrition (II)      |                               |                              |          |                               |            |
| Spent Black mass    |                               |                              |          |                               |            |
| Cumulative time (s) | Cumulative water recovery (%) | Cumulative LMOS recovery (%) | R/W LMOs | Cumulative water recovery (%) | ENT Tracer |
| 18                  | 1.75                          | 3.25                         | 1.86     | 1.03                          | 0.59       |
| 36                  | 2.48                          | 6.02                         | 2.42     | 1.82                          | 0.73       |
| 54                  | 3.5                           | 9.31                         | 2.28     | 2.43                          | 0.67       |
| 90                  | 5.20                          | 11.20                        | 2.15     | 3.14                          | 0.60       |
| 390                 | 11.93                         | 17.58                        | 1.47     | 5.47                          | 0.46       |
| Model Black mass    |                               |                              |          |                               |            |
| Cumulative time (s) | Cumulative water recovery (%) | Cumulative LMOS recovery (%) | R/W LMOs | Cumulative water recovery (%) | ENT Tracer |

| 18                                   | 3.07                          | 1.88                         | 0.61     | 1.55                          | 0.51       |
|--------------------------------------|-------------------------------|------------------------------|----------|-------------------------------|------------|
| 36                                   | 4.04                          | 2.14                         | 0.53     | 1.87                          | 0.46       |
| 54                                   | 4.41                          | 2.23                         | 0.51     | 1.96                          | 0.44       |
| 90                                   | 5.17                          | 2.40                         | 0.46     | 2.17                          | 0.42       |
| 390                                  | 10.58                         | 3.20                         | 0.30     | 2.96                          | 0.28       |
| <b>Attrition with kerosene (III)</b> |                               |                              |          |                               |            |
| <b>Spent Black mass</b>              |                               |                              |          |                               |            |
| Cumulative time (s)                  | Cumulative water recovery (%) | Cumulative LMOS recovery (%) | R/W LMOS | Cumulative water recovery (%) | ENT Tracer |
| 18                                   | 4.14                          | 9.70                         | 2.34     | 5.06                          | 1.22       |
| 36                                   | 6.13                          | 13.81                        | 2.25     | 6.20                          | 11.01      |
| 54                                   | 7.26                          | 16.33                        | 2.25     | 6.77                          | 0.93       |
| 90                                   | 8.43                          | 19.00                        | 2.28     | 7.24                          | 0.86       |
| 390                                  | 14.19                         | 26.16                        | 1.84     | 9.55                          | 0.67       |
| <b>Model Black mass</b>              |                               |                              |          |                               |            |
| Cumulative time (s)                  | Cumulative water recovery (%) | Cumulative LMOS recovery (%) | R/W LMOS | Cumulative water recovery (%) | ENT Tracer |
| 18                                   | 4.19                          | 3.76                         | 0.90     | 3.35                          | 0.80       |
| 36                                   | 4.77                          | 3.94                         | 0.83     | 3.53                          | 0.74       |
| 54                                   | 5.22                          | 4.05                         | 0.78     | 3.64                          | 0.70       |
| 90                                   | 5.62                          | 4.16                         | 0.74     | 3.80                          | 0.68       |
| 390                                  | 8.14                          | 4.72                         | 0.58     | 4.07                          | 0.50       |

| Attrition with kerosene (III) |                               |                              |          |                                |            |
|-------------------------------|-------------------------------|------------------------------|----------|--------------------------------|------------|
| Spent Black mass              |                               |                              |          |                                |            |
| Cumulative time (s)           | Cumulative water recovery (%) | Cumulative LMOs recovery (%) | R/W LMOs | Cumulative tracer recovery (%) | ENT Tracer |
| 18                            | 4.14                          | 9.70                         | 2.34     | 5.06                           | 1.22       |
| 36                            | 6.13                          | 13.81                        | 2.25     | 6.20                           | 1.01       |
| 54                            | 7.26                          | 16.33                        | 2.25     | 6.77                           | 0.93       |
| 90                            | 8.43                          | 19.00                        | 2.25     | 7.24                           | 0.86       |
| 390                           | 14.19                         | 26.16                        | 1.84     | 9.55                           | 0.67       |
| Model Black mass              |                               |                              |          |                                |            |
| Cumulative time (s)           | Cumulative water recovery (%) | Cumulative LMOs recovery (%) | R/W LMOs | Cumulative tracer recovery (%) | ENT Tracer |
| 18                            | 4.19                          | 3.76                         | 0.90     | 3.35                           | 0.80       |
| 36                            | 4.77                          | 3.94                         | 0.83     | 3.53                           | 0.74       |
| 54                            | 5.22                          | 4.05                         | 0.78     | 3.64                           | 0.70       |
| 90                            | 5.62                          | 4.16                         | 0.74     | 3.80                           | 0.68       |
| 390                           | 8.14                          | 4.73                         | 0.58     | 4.07                           | 0.50       |
