# Supplementary material
Source: MDPI journal article supplement (https://www.mdpi.com/2075-163X/12/1/72)
Supplement: s1 [file s1]

### Supplementary data S3

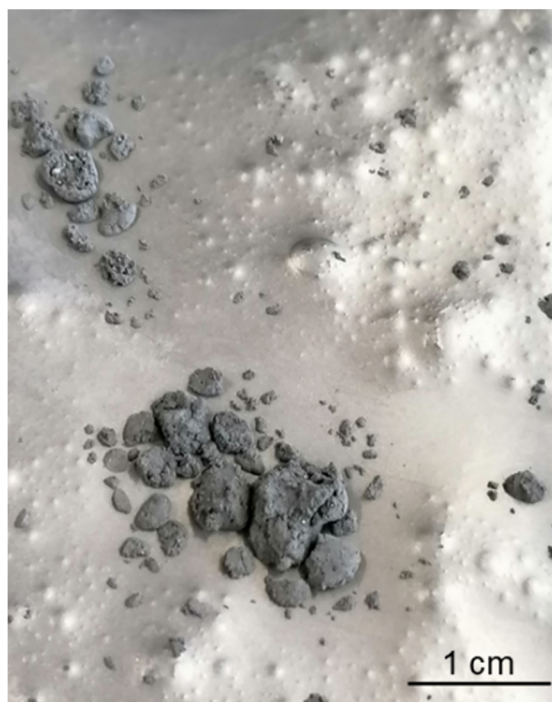

Figure S2 Picture from the top of the flotation cell showing non-wetted cluster on top of the pulp after adding spent black mass into water.
